# Supplementary material
Source: PubMed Central journal article supplement (PMC4575813)
Supplement: NIHMS714787-supplement-supplementary_data1.pdf [file NIHMS714787-supplement-supplementary_data1.pdf]

Supplementary Material for the article

Addiction Resistance: Definition, Validation and Association with Mastery

Kenneth S. Kendler

John Myers

From the Virginia Institute for Psychiatric and Behavioral Genetics (Dr. Kendler and Mr. Myers), and the Departments of Psychiatry (Dr. Kendler and Mr. Myers), and Human and Molecular Genetics (Dr. Kendler), Virginia Commonwealth University School of Medicine, Richmond, VA.

Corresponding author: Kenneth S. Kendler, Virginia Institute for Psychiatric and Behavioral Genetics of VCU, Box 980126, Richmond, VA 23298-0126, USA; phone: (804) 828-8590; FAX: (804) 828-1471; E-mail: [kendler@vcu.edu](mailto:kendler@vcu.edu)

This material supplements, but does not replace, the peer-reviewed article in

Drug and Alcohol Dependence

## Mastery Items

|   |                                                                            |
|---|----------------------------------------------------------------------------|
| 1 | There is no way I can solve some of the problems I have                    |
| 2 | Sometimes I feel that I'm being pushed around in life                      |
| 3 | I have little control over things that happen to me                        |
| 4 | What happens to me in the future mostly depends on me                      |
| 5 | I can do just about anything I really set my mind to                       |
| 6 | I often feel helpless in dealing with the problems of life                 |
| 7 | There is little I can do to change many of the important things in my life |
| 8 | Things never work out the way I want them to                               |
